# Supplementary material for: Functional-Group Compatible Electrooxidation Synthesis of Key Antibiotic Intermediate Rifamycin O
Source: Research Square preprint supplement (doi:10.21203/rs.3.rs-7115804/v1), 2025-07-29
Supplement: Supplementary file 1 [file d880d63a0e8a5623e7901fe5.docx]

**Supplementary Information**

**Functional-Group Compatible Electrooxidation Synthesis of Rifamycin O Key Antibiotic Intermediate**

Lihao Liu1,#, Shaoming Zhu3,#, Kai Li1,#, Yuhang Wang1, Suiqin Li4, Jiahui He1, Pan Hu1, Chuang Qi1, Ruixiang Liang1, Xing Zhong1,2,*, Jianguo Wang1,*

1State Key Laboratory of Green Chemical Synthesis and Conversion, Zhejiang Key Laboratory of Surface and Interface Science and Engineering for Catalysts, College of Chemical Engineering, Zhejiang University of Technology, Hangzhou 310032, China

2Innovation Research Center for Advanced Environmental Technology, Eco-Industrial Innovation Institute, ZJUT, Rong-Chang East Road, Quzhou 324400, China

3Zhejiang Changhai Pharmaceuticals Co., Ltd., Shaoxing 312000, China

4Zhejiang Key Laboratory of Functional ionic membrane Materials and Technology for Hydrogen Production, Shaoxing University, Shaoxing 312000, China

#L. Liu, S. Zhu, K. Li contribute to this work equally.

*Correspondence and requests for materials should be addressed to X. Zhong (email: [zhongx@zjut.edu.cn](mailto:zhongx@zjut.edu.cn)) or J.G.W. (email: jgw@zjut.edu.cn).

.

**Table of Contents**

[Supplementary Fig. 1 3](#_Toc127303166)

[Supplementary Fig. 2 4](#_Toc127303165)

[Supplementary Fig. 3 5](#_Toc127303166)

[Supplementary Fig. 4 6](#_Toc127303167)

[Supplementary Fig. 5 7](#_Toc127303167)

[Supplementary Fig. 6 8](#_Toc127303168)

[Supplementary Fig. 7 9](#_Toc127303169)

[Supplementary Fig. 8 10](#_Toc127303170)

[Supplementary Fig. 9 11](#_Toc127303166)

[Supplementary Fig. 10 12](#_Toc127303167)

[Supplementary Fig. 11 13](#_Toc127303167)

[Supplementary Fig. 12 14](#_Toc127303168)

[Supplementary Fig. 13 15](#_Toc127303169)

[Supplementary Fig. 14 16](#_Toc127303170)

[Supplementary Fig. 15 17](#_Toc127303164)

[Supplementary Fig. 16 18](#_Toc127303165)

[Supplementary Fig. 17 19](#_Toc127303166)

[Supplementary Fig. 18 20](#_Toc127303167)

**Supplementary Figure**

**
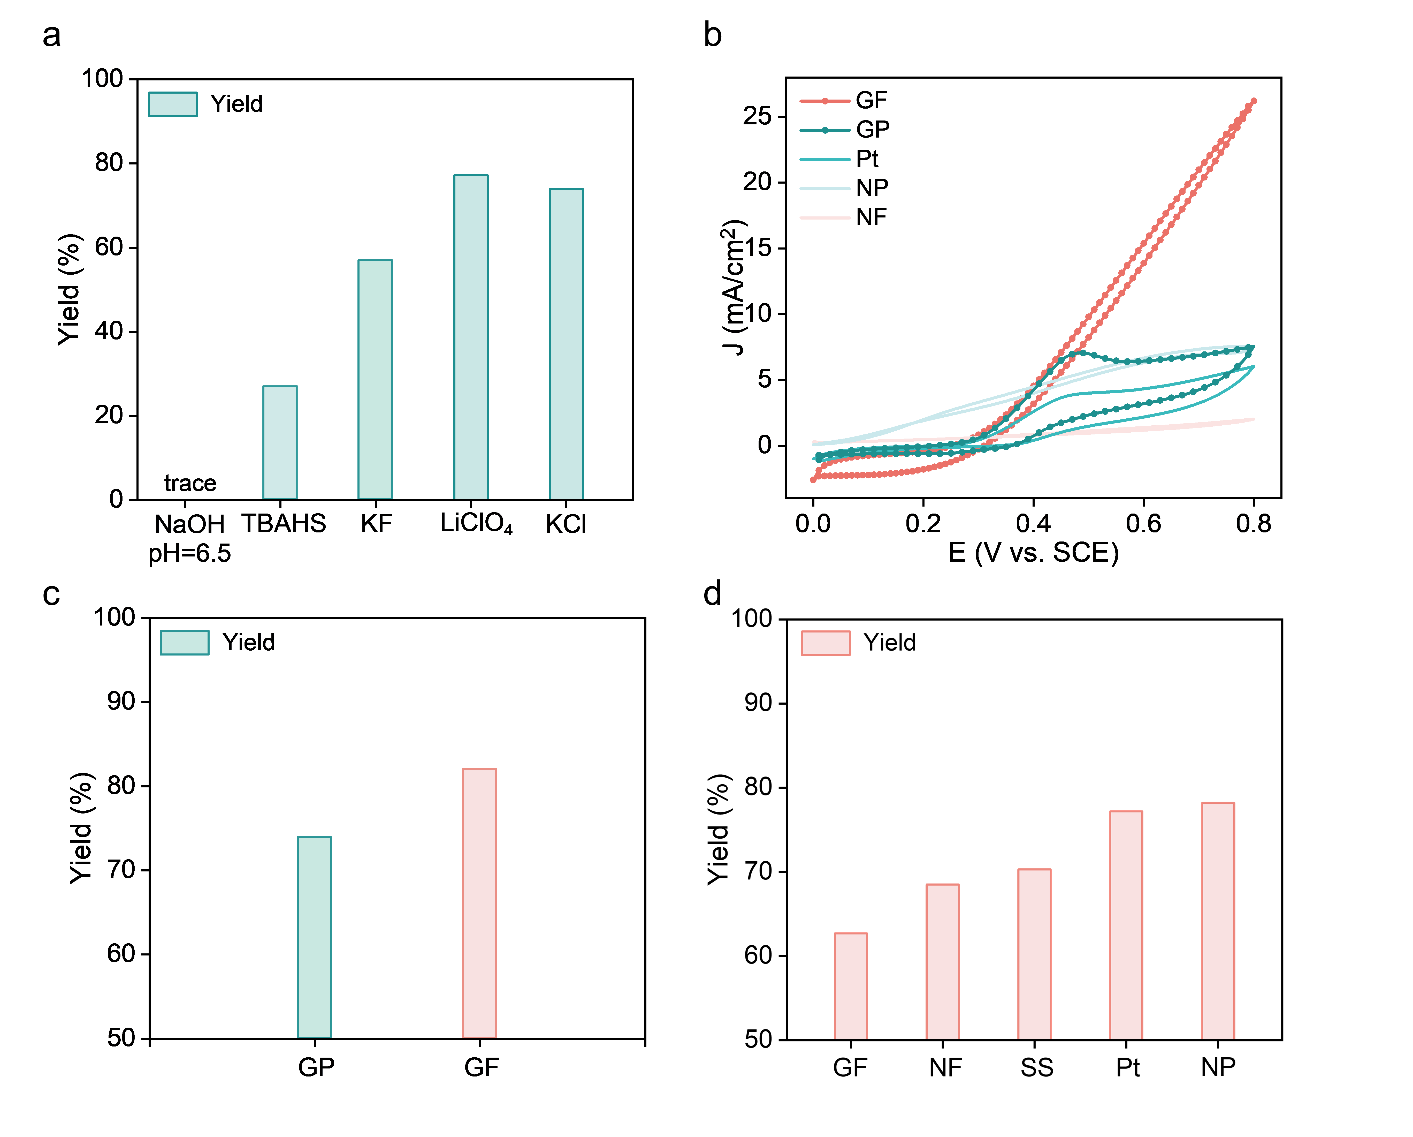
**

**Supplementary Fig. 1. Optimization of reaction conditions. a** RO yield in different electrolytes. **b** CV analysis of different anode electrode. **c** RO yield for GP or GF as anode electrode. **d** RO yield in different cathode electrode.


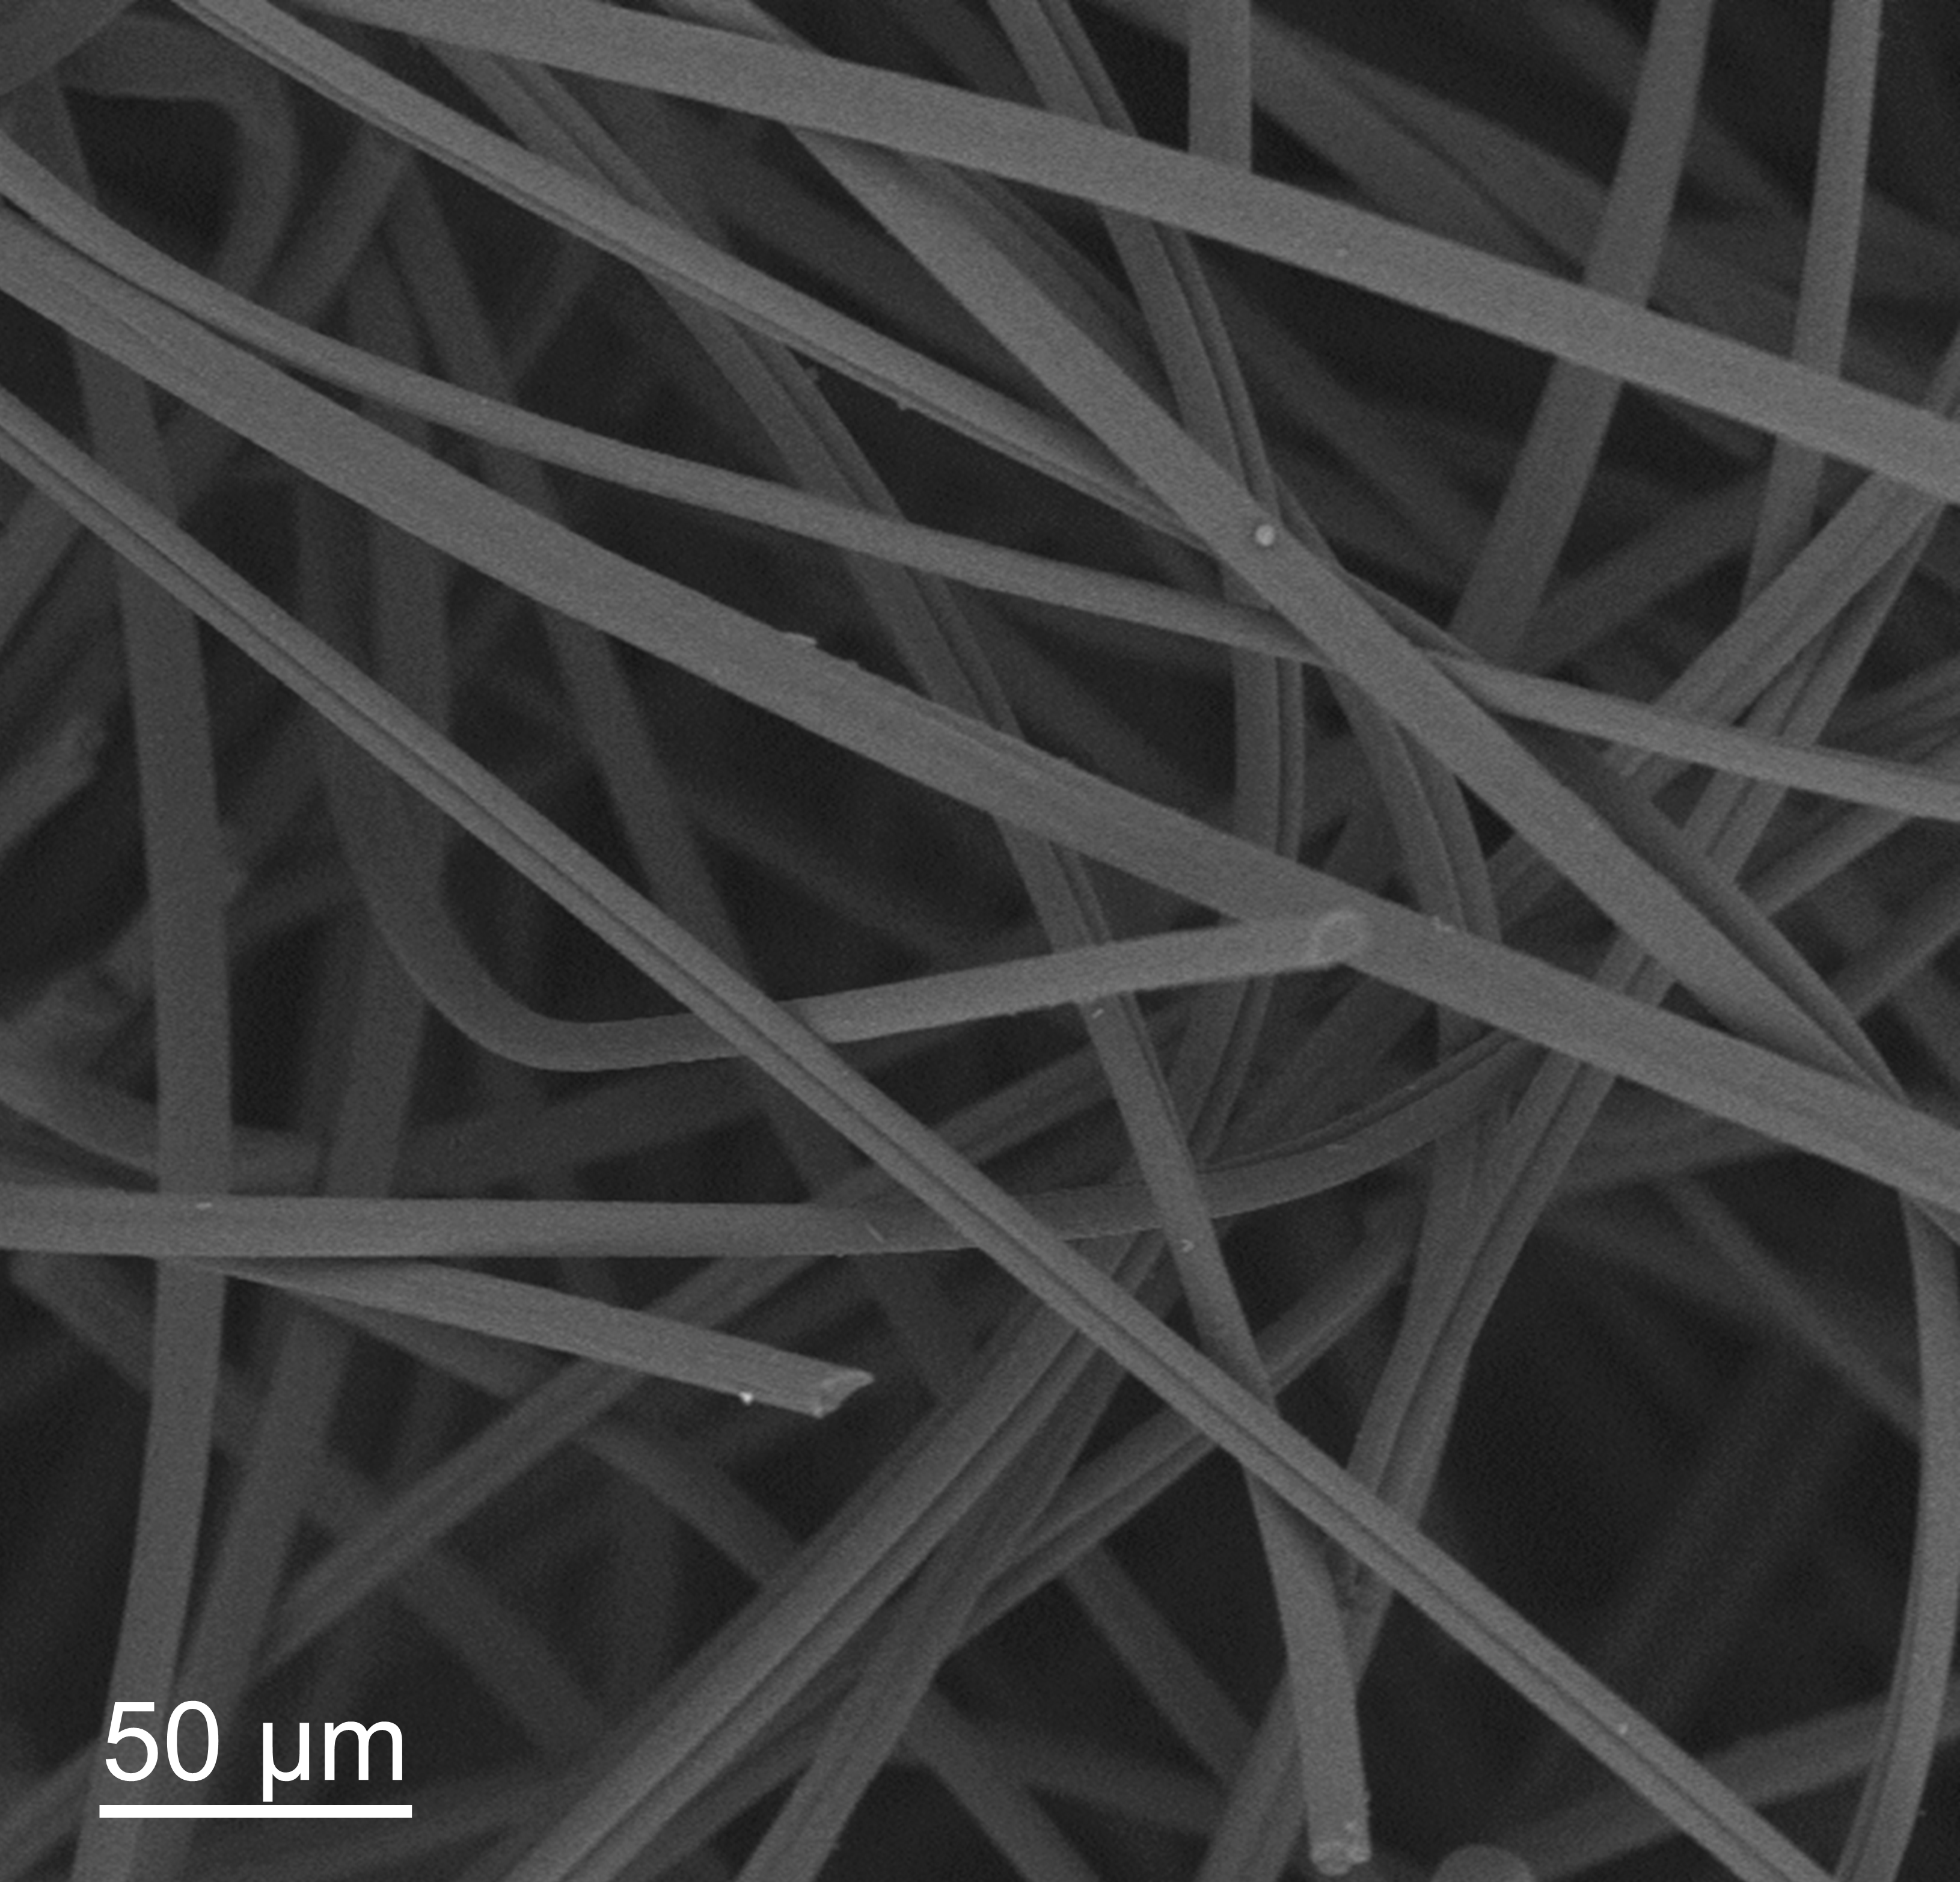


**Supplementary Fig. 2. Morphology characterization.** SEM image of Graphite form.

**Supplementary Fig. 3. Analysis of HPLC chromatogram.** HPLC chromatogram at the end of the electrooxidation of RB.

**Supplementary Fig. 4.** **Electrochemical performances.** Yield comparison of the electrooxidation of RB (KCl as electrolyte).

**Supplementary Fig. 5.** **Electrochemical performances.** Effect of different water quantity on the electrooxidation of RB (LiClO4 as electrolyte).

**Supplementary Fig. 6.** **Electrochemical performances.** Effect of different water quantity on the electrooxidation of RB (KCl as electrolyte).

**Supplementary Fig. 7.** **Electrochemical performances.** Conversion in the presence or absence of water.

**Supplementary Fig. 8.** **Tafel plot.** Tafel plot for the electrooxidation of RB in the presence or absence of water.


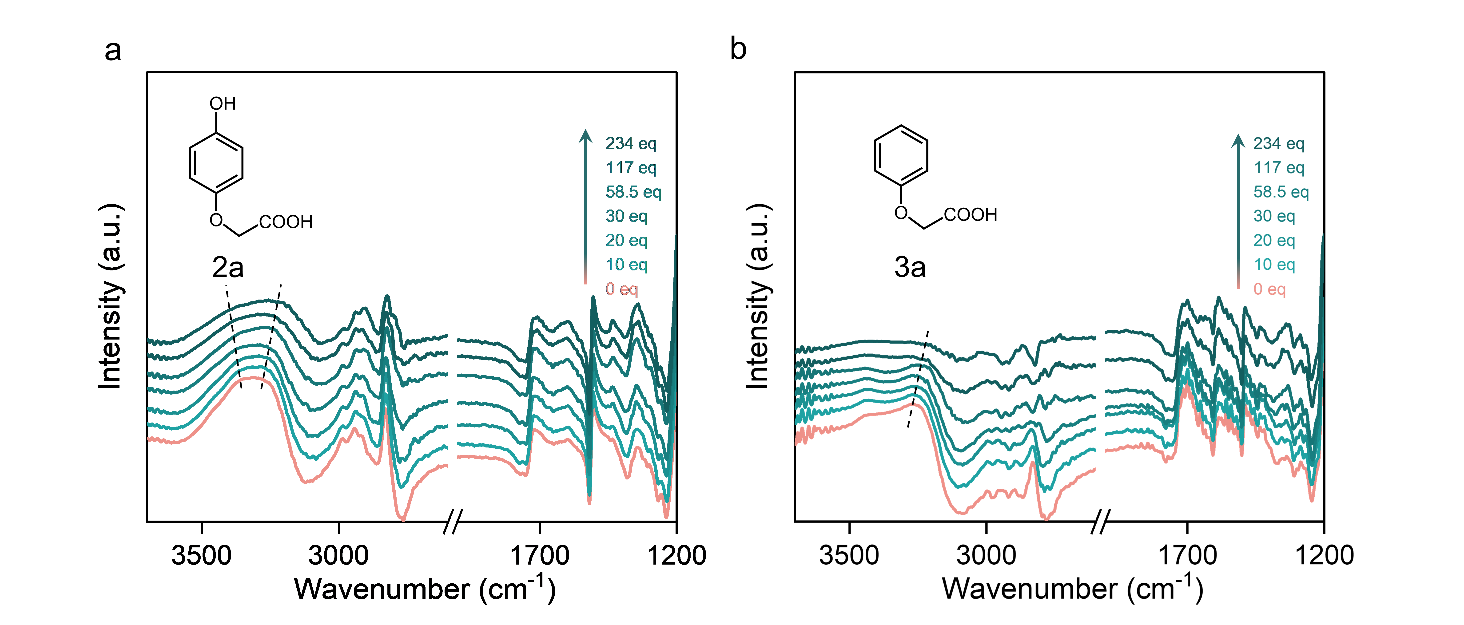


**Supplementary Fig. 9. FTIR spectra.** FTIR spectra of 2a (a) and 3a (b) in methanol solutions with different water contents.

**Supplementary Fig. 10. Conductivity text.** Conductivity in different water (LiClO4 as electrolyte).

**Supplementary Fig. 11. Electrochemical performances.** CV analysis in the presence or absence of water.


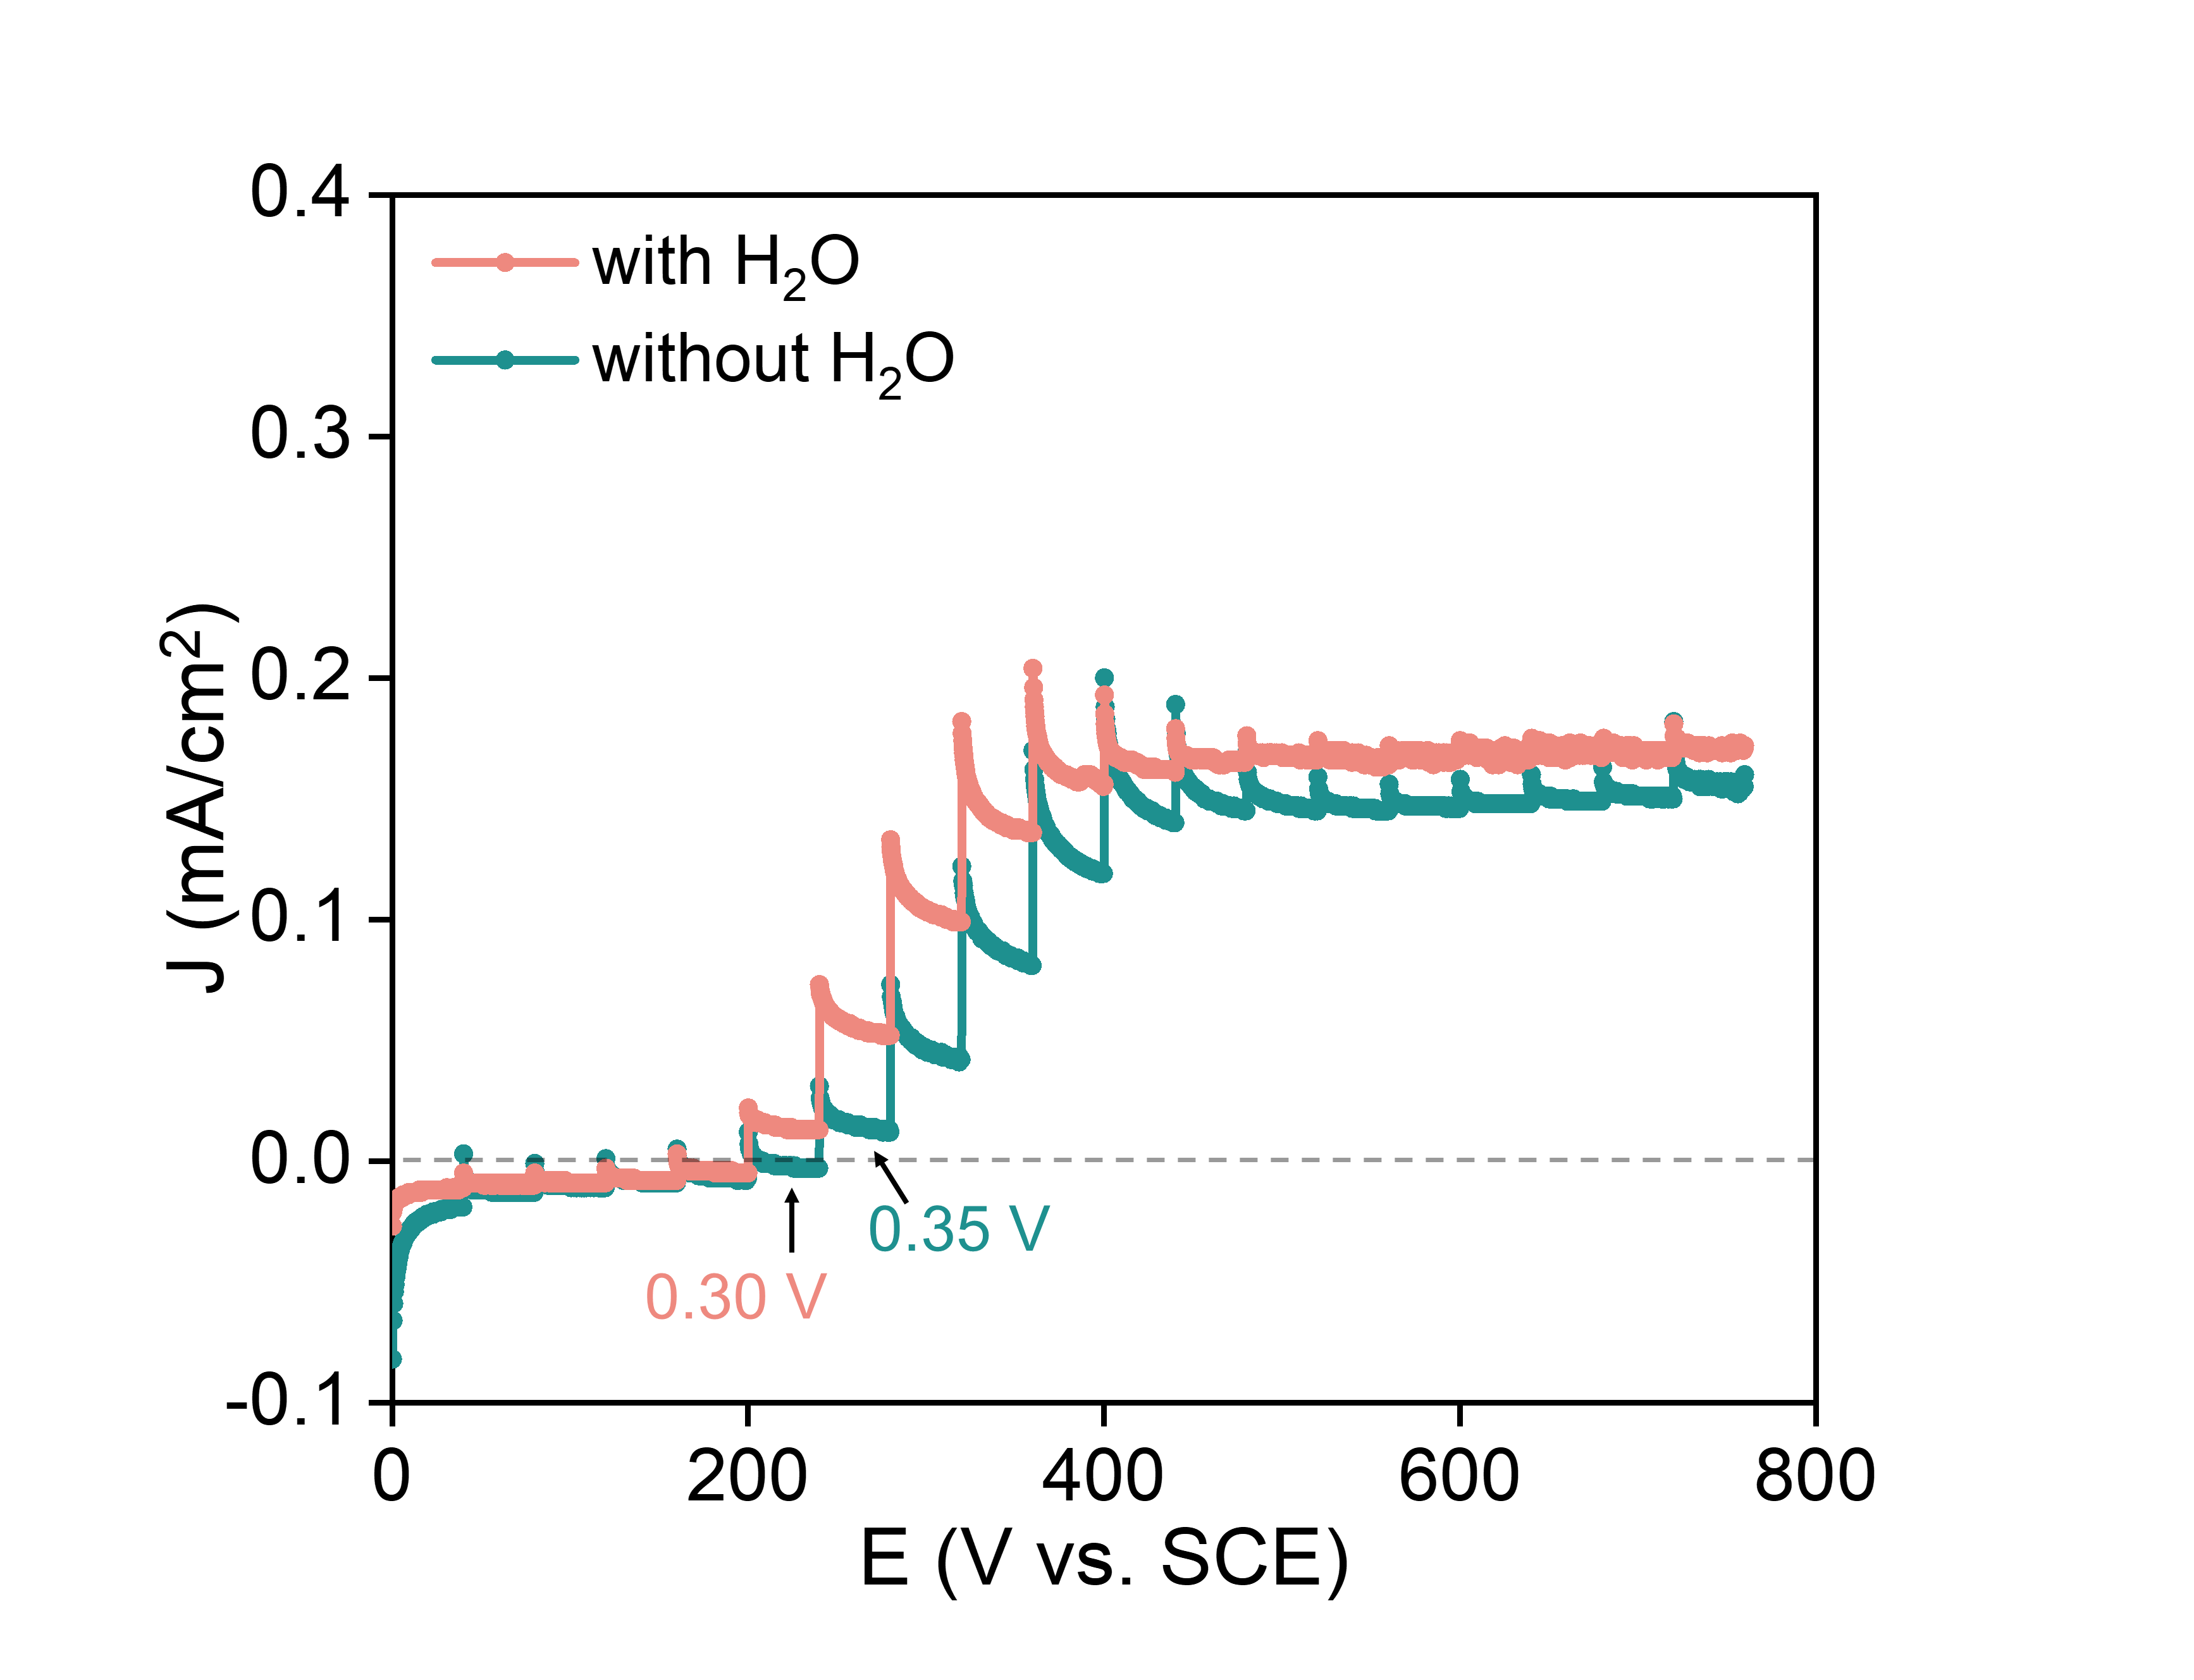


**Supplementary Fig. 12. Electrochemical performances.** i-E plot of electrooxidation of RB under in-situ IRAS testing conditions.

**
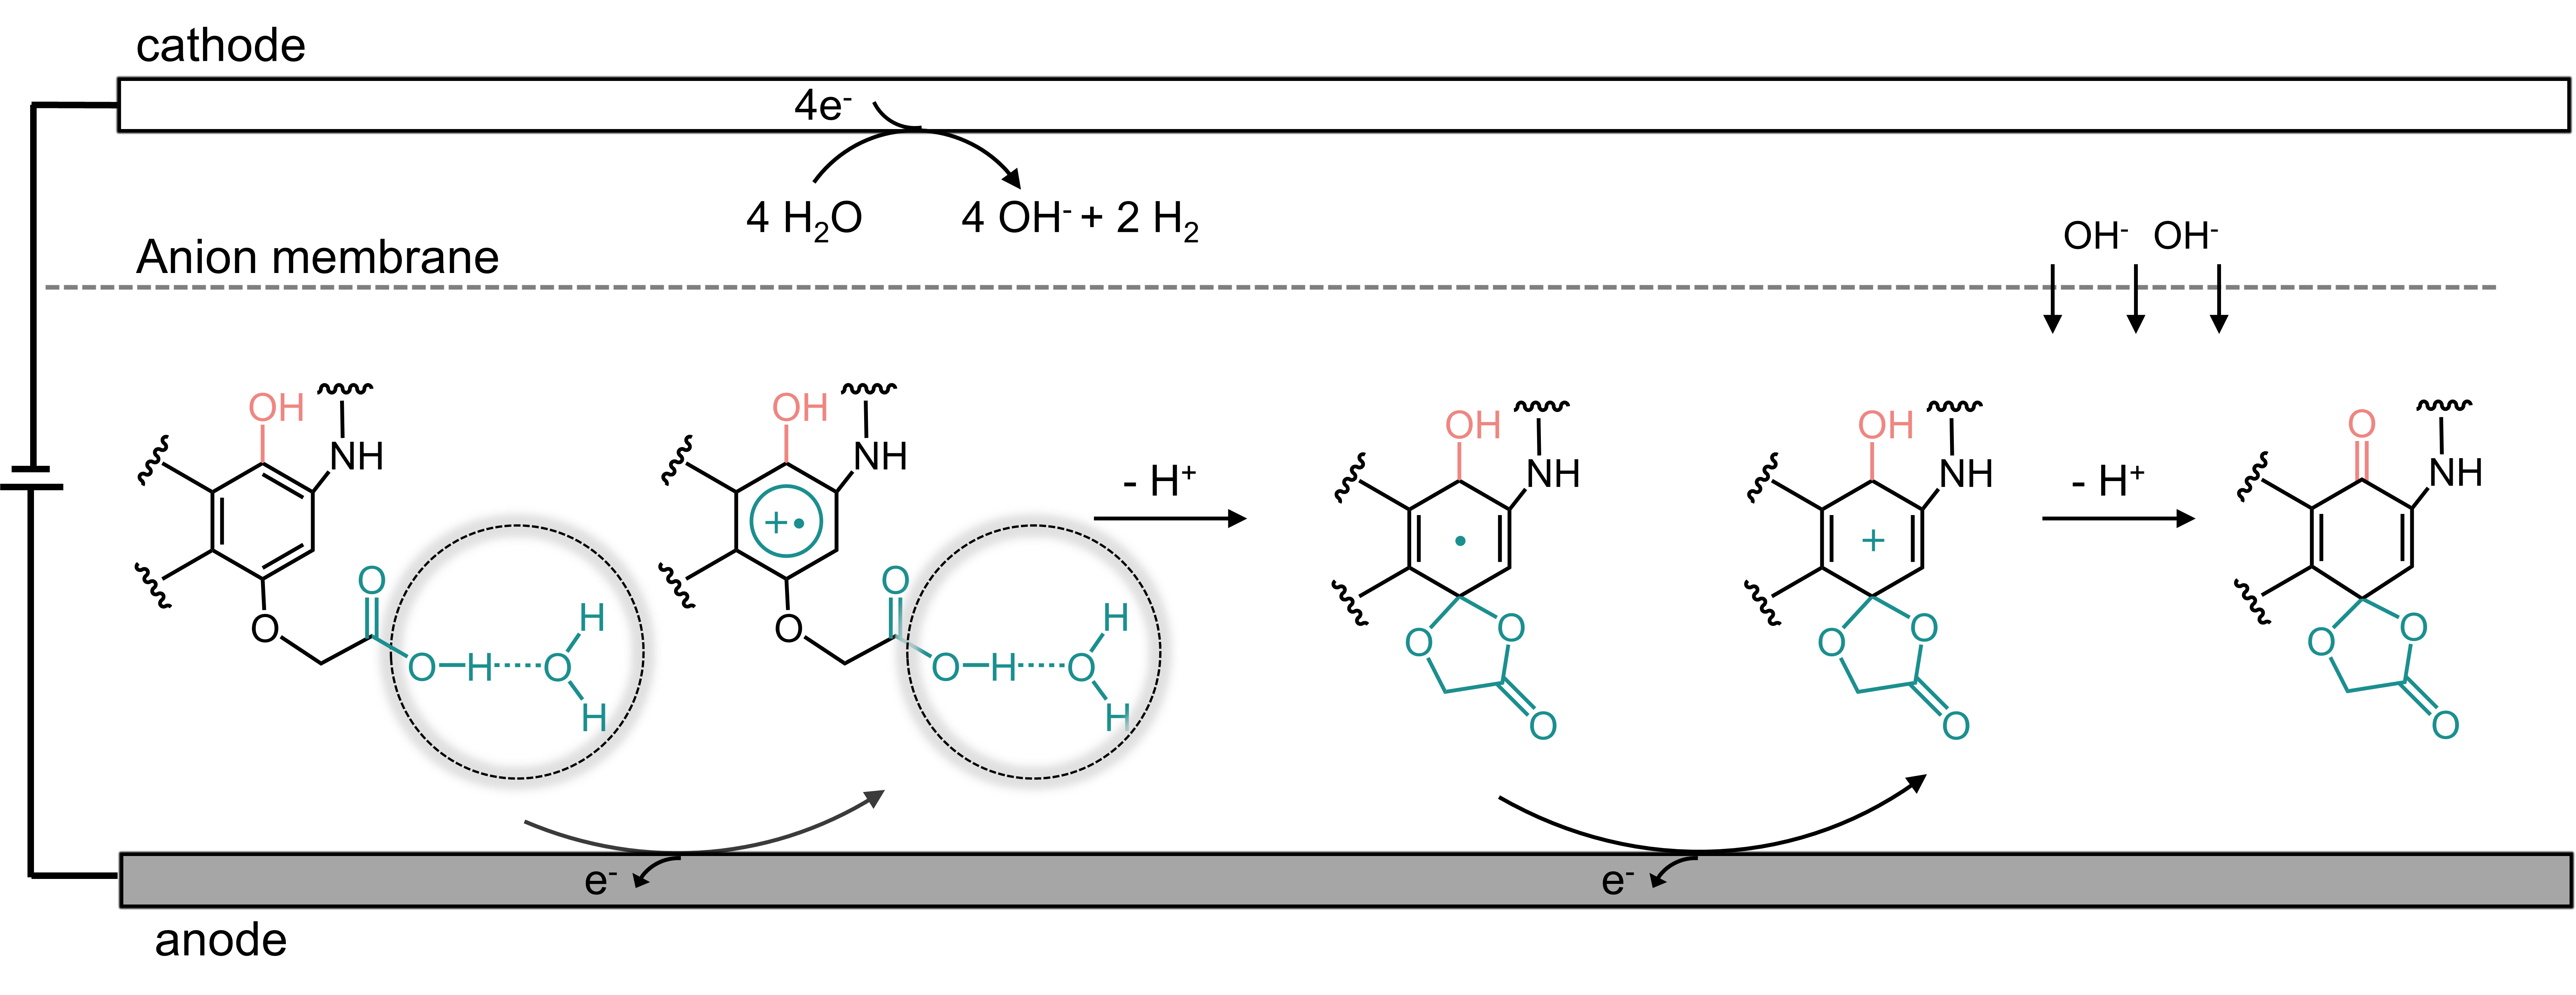
**

**Supplementary Fig. 13.** **Possible mechanism.** Possible electrooxidation mechanism of RB


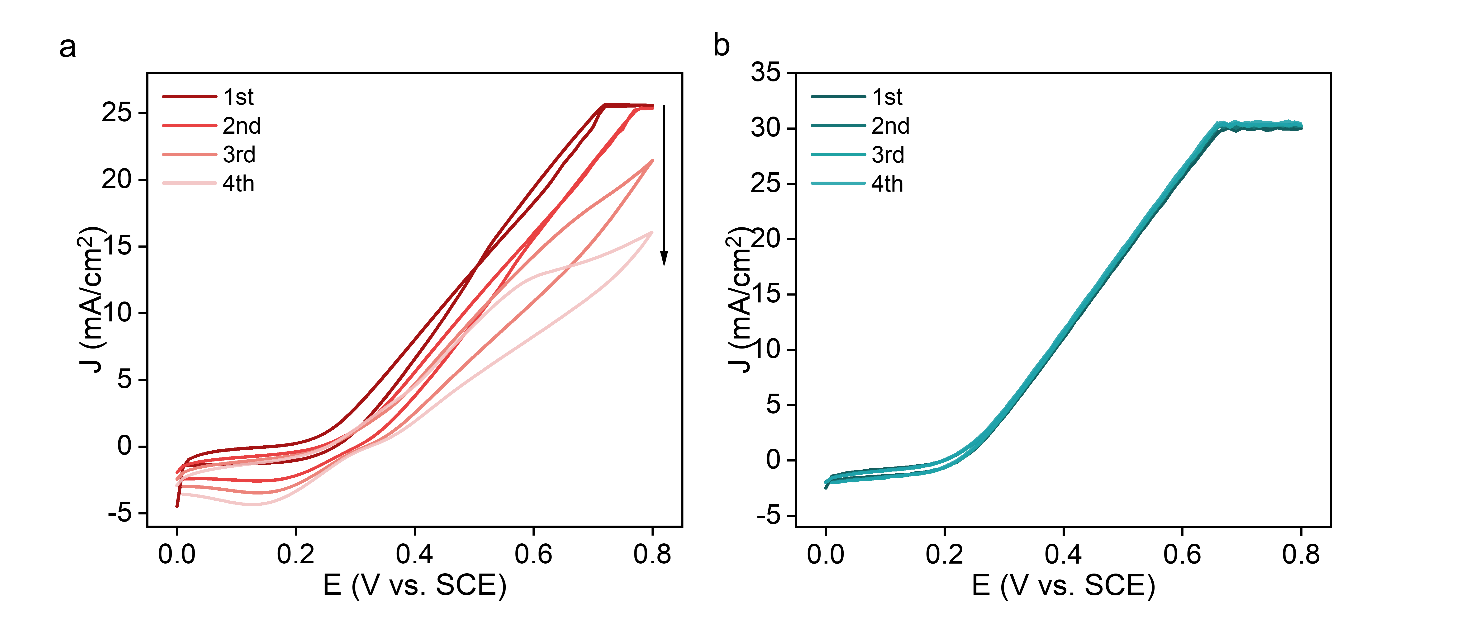


**Supplementary Fig. 14. Electrochemical performances.** CV analysis for the electrooxidation of RB in the absence **a** or presence **b** of stir.


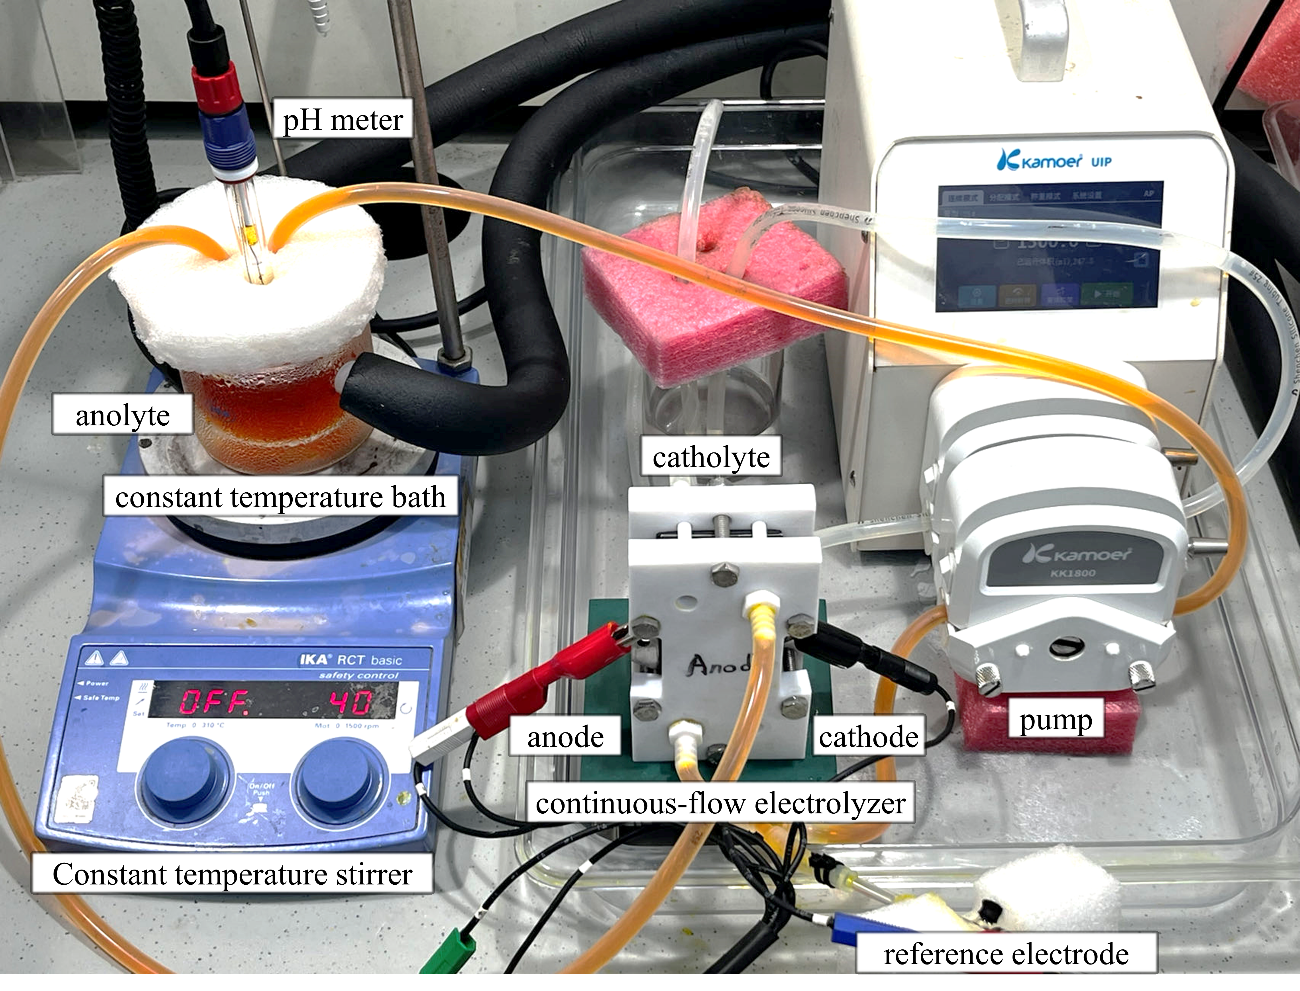


**Supplementary Fig. 15. Flow electrolyzer.** Electrolysis setup of the electrooxidation of RB in a continuous-flow electrolyzer.


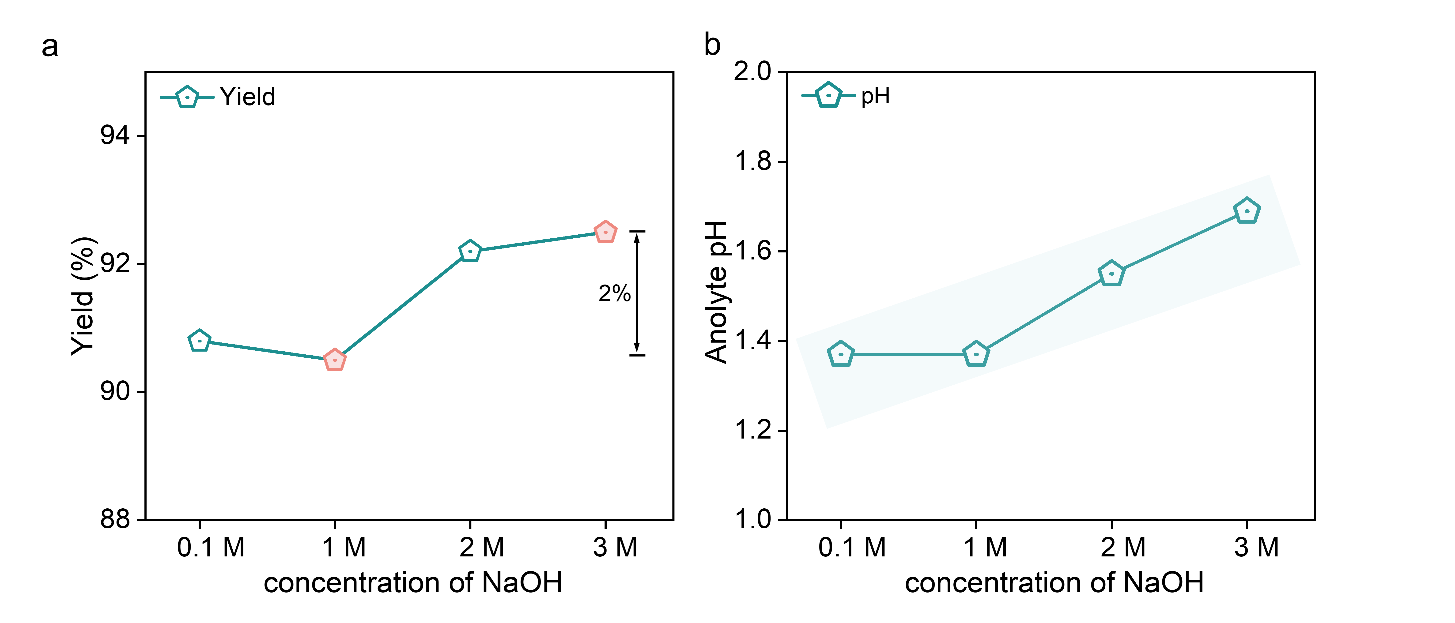


**Supplementary Fig. 16. Electrochemical performances.** **a** RO yield in different concentration of NaOH. **b** Electrolyte pH of the anode side after reaction.

**
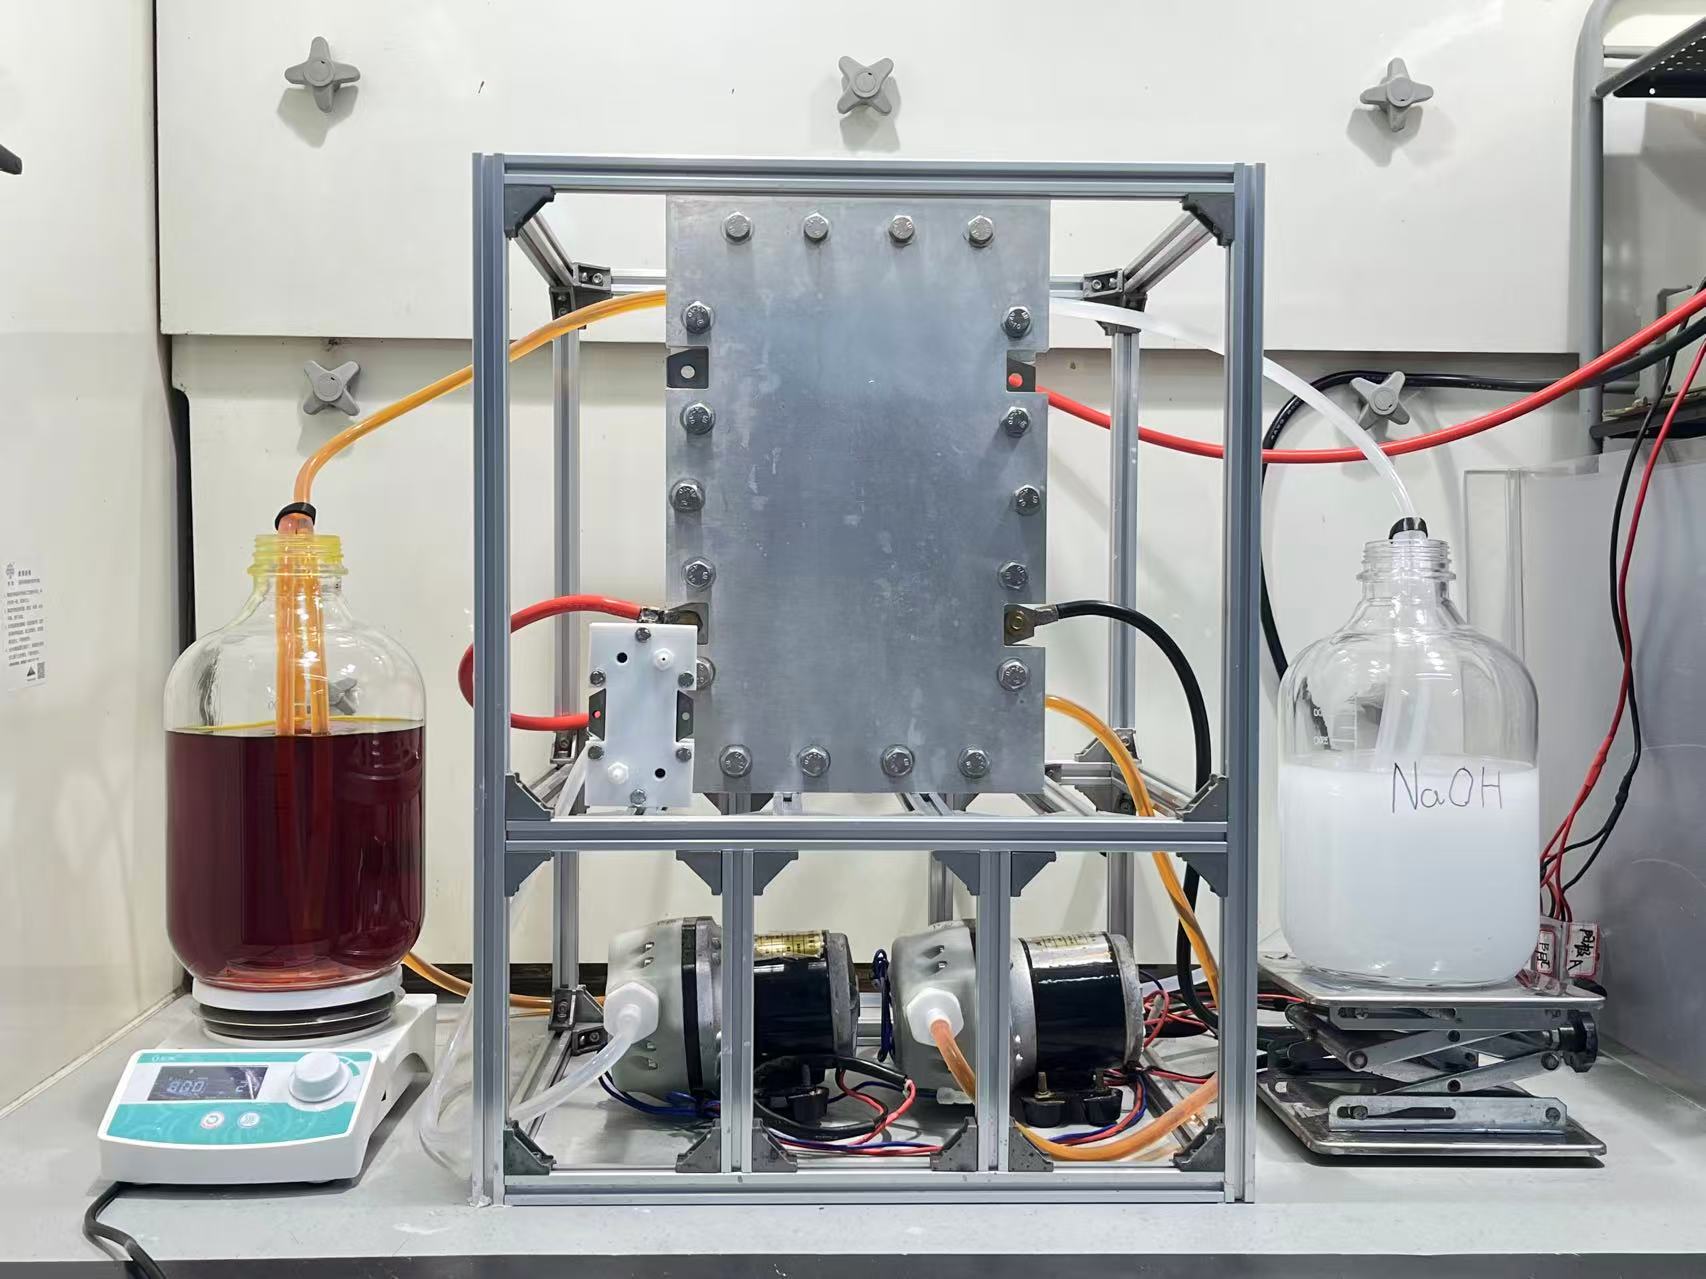
**

**Supplementary Fig. 17. Photograph of the scale-up amplification experiment.** Electrooxidation of RB on 50g scale


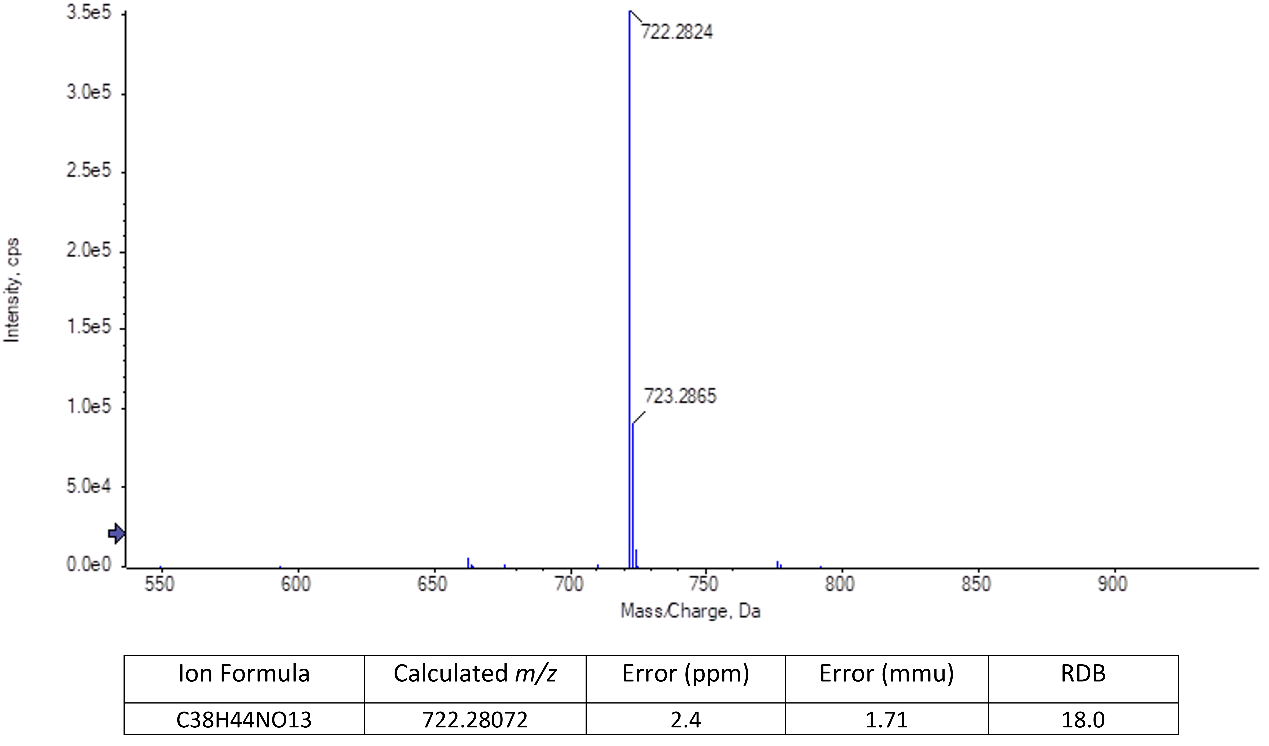


**Supplementary Fig. 18. Mass spectrum.** Mass spectrum of RO.
